# Supplementary material
Source: PubMed Central journal article supplement (PMC8369679)
Supplement: pt0c00129_si_001.pdf [file pt0c00129_si_001.pdf]

## **Fishing for Contact: Modeling Perivascular Glioma Invasion in the Zebrafish Brain**

Robyn A. Umans<sup>1</sup>, Mattie ten Kate<sup>2</sup>, Carolyn Pollock<sup>2</sup>, & \*Harald Sontheimer<sup>1,2</sup>

Center for Glial Biology in Health, Disease, and Cancer, The Fralin Biomedical  
Research Institute at VTC, Roanoke, Virginia, 24016, United States <sup>1</sup>

School of Neuroscience, Virginia Tech, Sandy Hall, 210 Drillfield Dr., Blacksburg,  
Virginia, 24061, United States <sup>2</sup>

\*Email: sontheim@vt.edu

## **Table of Contents:**

| <u>Data</u> | <u>Page Number</u> |
|-------------|--------------------|
| Figure 1    | 6                  |
| Figure 2    | 7                  |
| Figure 3    | 7                  |
| Figure 4    | 7                  |
| Figure 5    | 8                  |
| Figure 6    | 8                  |
| Figure S-1  | 6                  |
| Figure S-2  | 7                  |
| Movie S-1   | 7                  |

**Figure S-1. Tumor-vessel interactions are maintained in non-specific pathogen free zebrafish lines.** (A) A maximum intensity projection of a 7dpf *Tg(glut1b:mCherry)* larvae (red) implanted with D54-MG-eGFP tumor cells (green). (B) An area (dotted white box in A) of a representative Z-plane from the confocal stack showing the corresponding orthogonal planes, between the vessel (red) and glioma cell (green) signals.  $n=18$  animals. Scale bar= 10 $\mu$ m.

**Figure S-2. Labeling glioma cells with lipophilic dyes is not ideal for visualizing perivascular glioma invasion.** (A) A maximum intensity projection of the whole brain of a 4dpf *Tg(fli1a:eGFP)<sup>y1</sup>;casper* (green) larvae with GBM22 cells (red) loaded with a lipophilic dye 24 hours post-injection. (B) A maximum intensity projection image of the red channel displaying the punctate staining of the human glioma cells. Scale bar= 100 $\mu$ m.

**Movie S-1. Human glioma cells expand within in the periphery of the developing zebrafish larvae.** A 3D rendered volume view movie of a 10dpf *Tg(fli1a:eGFP)<sup>y1</sup>;casper* zebrafish, 1 week post tumor implantation. Note that the tumor cells (red) do not interact with any pre-existing vasculature (green) and have migrated towards the rostral end of the animal, from the dorsal fin area past the swim bladder.

Figure S-1.



Figure S-2.
